# Supplementary material for: Azacitidine is a potential therapeutic drug for pyridoxine-refractory female X-linked sideroblastic anemia
Source: PubMed Central journal article supplement — Blood Adv. 2022 Feb 11;6(4):1100–14. doi: 10.1182/bloodadvances.2021005664 (PMC8864662; doi:10.1182/bloodadvances.2021005664), 2022-02-11

## 1 **Supplemental Methods**

### 2 **Maintenance of iPSC lines**

3 The maintenance of all iPSC lines was performed on STO feeder cells in primate ES cell  
4 medium (ReproCell) supplemented with 4 ng/mL recombinant bFGF (Wako), as  
5 previously reported.<sup>1</sup> The iPSC lines were differentiated after culturing on Matrigel-  
6 coated plates for one passage to remove feeder cells.

7

### 8 **Lentiviral transduction**

9 Wild-type *ALAS2* cDNA was produced from bone marrow cells from a healthy donor  
10 using the following primers: forward, 5'-CACCATGGTGACTGCAGCCATG-3', and  
11 reverse, 5'-TCAGGCATAGGTGGTGAC-3', and subcloned into the pENTR-D-TOPO  
12 vector (Thermo Fisher Scientific). *ALAS2* was transferred from the entry clone into the  
13 pLenti6.3/TO/V5-DEST destination vectors (Thermo Fisher Scientific) using a gateway  
14 LR reaction, according to the manufacturer's instructions. FACS-sorted HPCs on day 15  
15 were transfected lentivirally using wild-type *ALAS2* and a RetroNectin Plate (Takara)  
16 according to the manufacturer's instructions.

17

### 18 **CFU assay**

19 The CFU assay was performed based on a previous report.<sup>2</sup> Lineage assignment was  
20 determined by morphologic analysis, and some typical colonies (especially erythroid and  
21 mixed colonies) were picked up and assessed using May Grunwald-Giemsa staining.

22

### 23 **Flow cytometry analysis and cell sorting**

24 For the flow cytometry analysis or sorting of iPSC-derived hematopoietic cells, EBs were

1 dissociated using 0.25% trypsin followed by pipetting 10 to 20 times. The cells were  
2 subjected to flow cytometry analysis or cell sorting using FACS ARIA II (Becton-  
3 Dickinson). Dead cells were removed using 7-AAD (BD Pharmingen).

#### 4 5 **Antibodies**

6 The antibodies CD34-PE (BD Biosciences, 348057), CD43-FITC (BD Biosciences,  
7 555475), CD38-APC (BD Biosciences, 555462), Human Hematopoietic Lineage APC  
8 cocktail (eBioscience, 22-7776-72), CD235a-APC (BD Bioscience, 551336), CD71-  
9 FITC (BD Biosciences, 555536), and TRA1-60-PE (Stemgent, 09-0009) were used for  
10 FACS analysis and cell sorting. Glycophorin A MicroBeads, human (Miltenyi Biotec,  
11 130-050-501) and CD34 MicroBead Kit, human (Miltenyi Biotec, 130-046-702) were  
12 used for the MACS. Histone H3K27me3 antibody (mAb) (Active Motif, 61017), Alexa  
13 Fluor 488 Mouse anti-Human TRA-1-60 Antigen (BD Biosciences, 560173), and Alexa  
14 Fluor 488 Mouse anti-SSEA-4 (BD Biosciences, 560308) were used for immunostaining.

#### 15 16 **RNA extraction and quantitative RT-PCR analysis**

17 The cells were eluted and homogenized using QIAzol (Qiagen). RNA was extracted using  
18 the miRNeasy Micro Kit (Qiagen) following the manufacturer's protocol, and cDNA  
19 synthesis was performed using ReverTra Ace qPCR RT Master Mix with gDNA Remover  
20 (TOYOBO). The expression level of each gene was determined using TB Green Premix  
21 Ex Taq II (Takara) and the StepOne Real-Time PCR System (Applied Biosystems). Data  
22 were normalized to the expression level of GAPDH. The primers for the analysis are listed  
23 in supplemental Table 2.

1 **Immunostaining**

2 Immunostaining of H3K27me3, TRA-1-60, and SSEA-4 was performed using standard  
3 immunostaining protocols, as previously reported.<sup>3</sup>

4

5 **May Grunwald-Giemsa staining**

6 May Grunwald-Giemsa staining was performed using May-Grunwald stain solution  
7 (Wako) and Giemsa solution (Wako) following the manufacturer's instructions.

8

9 **Prussian blue staining**

10 Prussian blue staining was performed using the Fe stain kit (Muto Pure Chemicals Co.,  
11 Ltd.) following the manufacturer's instructions.

12

13 ***o*-Dianisidine staining**

14 *o*-Dianisidine staining was performed in 0.01 M sodium acetate, 0.65% H<sub>2</sub>O<sub>2</sub>, 40%  
15 ethanol, and 0.6 mg/mL *o*-dianisidine (Sigma) for 15 minutes.<sup>4</sup>

16

17 **RNA-seq**

18 RNA was extracted from TRA1-60+ iPSCs, CD34+ cells on day 8, CD43+CD34+CD38-  
19 Lin- cells on day 15, and CD235a+ erythroblasts on day 34 from three WT and four MT  
20 iPSC lines previously sorted using FACS. RNA was also extracted from MACS-sorted  
21 CD235a+ primary erythroblasts in patient bone marrow mononuclear cells isolated using  
22 Ficoll-Paque Plus (GE Healthcare) and healthy donor bone marrow mononuclear cells  
23 (Lonza). The library was constructed using the TruSeq Stranded Total RNA with the Ribo-  
24 Zero Gold LT Sample Prep Kit, Sets A and B (Illumina), according to the manufacturer's

1 instructions. Sequencing was performed using the NextSeq 500/550 High Output Kit v2  
2 (75 cycles) (Illumina). Reads of the adapter sequences were trimmed using cutadapt-  
3 1.15.<sup>5</sup> Removal of the reads mapped to ribosomal RNA-seq was performed using Bowtie2  
4 and Samtools.<sup>6,7</sup> The reads were mapped to the human genome (GRCh38 from the UCSC  
5 Genome Browser) using STAR (version 2.5.4a), and RSeQC (version 2.6.4) was used for  
6 quality check.<sup>8,9</sup> HTSeq (version 0.9.1) was used to count the reads with the GENCODE  
7 annotation file (version 27), and the counts were normalized using DESeq2 (version  
8 1.24.0) in R (version 3.6.1).<sup>10-12</sup> We performed PCA and the Wald test using the DESeq2  
9 package and GO analysis and GSEA using the clusterProfiler (version 3.12.0) and  
10 enrichplot (version 1.6.1) packages.<sup>13,14</sup>

11  
12  
13  
14  
15  
16  
17  
18  
19  
20  
21  
22  
23  
24

## 1 **References**

- 2 1. Kajiwara M, Aoi T, Okita K, et al. Donor-dependent variations in hepatic  
3 differentiation from human-induced pluripotent stem cells. *Proc Natl Acad Sci U S A*.  
4 2012;109(31):12538-12543.
- 5 2. Nishizawa M, Chonabayashi K, Nomura M, et al. Epigenetic Variation between  
6 Human Induced Pluripotent Stem Cell Lines Is an Indicator of Differentiation Capacity.  
7 *Cell Stem Cell*. 2016;19(3):341-354.
- 8 3. Pomp O, Dreesen O, Leong DF, et al. Unexpected X chromosome skewing  
9 during culture and reprogramming of human somatic cells can be alleviated by exogenous  
10 telomerase. *Cell Stem Cell*. 2011;9(2):156-165.
- 11 4. Lieschke GJ, Oates AC, Crowhurst MO, Ward AC, Layton JE. Morphologic and  
12 functional characterization of granulocytes and macrophages in embryonic and adult  
13 zebrafish. *Blood*. 2001;98(10):3087-3096.
- 14 5. Martin M. Cutadapt removes adapter sequences from high-throughput  
15 sequencing reads. *EMBnetjournal*. 2011;17(1):10-12.
- 16 6. Langmead B, Salzberg SL. Fast gapped-read alignment with Bowtie 2. *Nat*  
17 *Methods*. 2012;9(4):357-359.
- 18 7. Li H, Handsaker B, Wysoker A, et al. The Sequence Alignment/Map format and  
19 SAMtools. *Bioinformatics*. 2009;25(16):2078-2079.
- 20 8. Dobin A, Davis CA, Schlesinger F, et al. STAR: ultrafast universal RNA-seq  
21 aligner. *Bioinformatics*. 2013;29(1):15-21.
- 22 9. Wang L, Wang S, Li W. RSeQC: quality control of RNA-seq experiments.  
23 *Bioinformatics*. 2012;28(16):2184-2185.
- 24 10. Anders S, Pyl PT, Huber W. HTSeq--a Python framework to work with high-

1 throughput sequencing data. *Bioinformatics*. 2015;31(2):166-169.

2 11. Mudge JM, Jungreis I, Hunt T, et al. Discovery of high-confidence human  
3 protein-coding genes and exons by whole-genome PhyloCSF helps elucidate 118 GWAS  
4 loci. *Genome Res*. 2019;29(12):2073-2087.

5 12. Love MI, Huber W, Anders S. Moderated estimation of fold change and  
6 dispersion for RNA-seq data with DESeq2. *Genome Biol*. 2014;15(12):550.

7 13. Yu G, Wang LG, Han Y, He QY. clusterProfiler: an R package for comparing  
8 biological themes among gene clusters. *OMICS*. 2012;16(5):284-287.

9 14. G Y. enrichplot: Visualization of Functional Enrichment Result. R package  
10 version 1.10.2. 2021.

11

12

13

14

15

16

17

18

19

20

21

22

23

24

1 **Supplemental Tables**

2 **Supplemental Table 1. Human iPSC lines used in the differentiation experiments**

3

4 **Supplemental Table 2. List of primers used for RT-PCR**

5

6 **Supplemental Table 3. Results of GSEA (p.adjust < 0.05)**

7

8

9

10

11

12

13

14

15

16

17

18

19

20

21

22

23

24

**Supplemental Table 1 Human iPSC lines used in the differentiation experiments**

| ID         | Name of iPSC lines | Source  |        |                | HUMARA assay of iPSCs | sequencing of erythroblasts' cDNA | Teratoma formation | Karyotype | Pluripotent markers | Erythroid differentiation |
|------------|--------------------|---------|--------|----------------|-----------------------|-----------------------------------|--------------------|-----------|---------------------|---------------------------|
|            |                    | Patient | Origin | T / Non T cell |                       |                                   |                    |           |                     |                           |
| CiRA01059A | WT1-iPSC1          | SA1     | PBMC   | T              | WT                    | WT                                | Yes                | 46, XX    | Yes                 | Yes                       |
| CiRA01059B | WT1-iPSC2          | SA1     | PBMC   | T              | WT                    | WT                                | Yes                | 46, XX    | Yes                 | Yes                       |
| CiRA01059C | WT1-iPSC3          | SA1     | PBMC   | T              | WT                    | WT                                | Yes                | 46, XX    | Yes                 | Yes                       |
| CiRA01059D | MT1-iPSC1          | SA1     | PBMC   | T              | MT                    | MT                                | Yes                | 46, XX    | Yes                 | Yes                       |
| CiRA01059E | MT1-iPSC2          | SA1     | PBMC   | T              | MT                    | MT                                | Yes                | 46, XX    | Yes                 | Yes                       |
| CiRA01059E | MT1-iPSC3          | SA1     | PBMC   | T              | MT                    | MT                                | Yes                | 46, XX    | Yes                 | Yes                       |
| CiRA01059F | MT1-iPSC4          | SA1     | PBMC   | Non T          | MT                    | MT                                | Yes                | 46, XX    | Yes                 | Yes                       |
| CiRA01061A | WT3-iPSC1          | SA3     | PBMC   | Non T          | WT                    | N/A                               | Yes                | 46, XX    | N/A                 | Yes                       |
| CiRA01061B | WT3-iPSC2          | SA3     | PBMC   | Non T          | WT                    | N/A                               | Yes                | 46, XX    | N/A                 | Yes                       |
| CiRA01061C | MT3-iPSC1          | SA3     | PBMC   | Non T          | MT                    | N/A                               | Yes                | 46, XX    | N/A                 | Yes                       |
| CiRA01061D | MT3-iPSC2          | SA3     | PBMC   | T              | MT                    | N/A                               | Yes                | 46, XX    | N/A                 | Yes                       |

Abbreviations and explanations: WT, expressing active wild-type allele; MT, expressing active mutant allele; N/A, not applicable



**Supplemental Table 2****List of primers used for RT-PCR**

| <b>Genes</b> |         | <b>Sequences (5'-3')</b>   |
|--------------|---------|----------------------------|
| HBB          | Forward | TGTCCACTCCTGATGCTGTTATGG   |
|              | Reverse | AGCTTAGTGATACTTGTGGGCCAG   |
| HBG          | Forward | CGCTTCTGGAACGTCTGAGGTTAT   |
|              | Reverse | CCAGGAGCTTGAAGTTCTCAGGAT   |
| HO-1         | Forward | CTCAAACCTCCAAAAGC          |
|              | Reverse | TCAAAAACCAACCCCAACCC       |
| ALAS2        | Forward | CTGCCAGGGTGCGAGATT         |
|              | Reverse | TTGGCTGCTCCACTGTTACG       |
| GAPDH        | Forward | ACGAATTTGGCTACAGCAAC       |
|              | Reverse | CAGTGAGGGTCTCTCTCTTC       |
| OCT3/4       | Forward | CCCCAGGGCCCCATTTTGGTACC    |
|              | Reverse | ACCTCAGTTTGAATGCATGGGAGAGC |
| SOX2         | Forward | TTCACATGTCCCAGCACTACCAGA   |
|              | Reverse | TCACATGTGTGAGAGGGGCAGTGTGC |
| NANOG        | Forward | AGTGCAGTGGCGCGGTCTTGGCTCAC |
|              | Reverse | AGGCGGGCGGATCACAAGGTCAGGAG |

**Supplemental Table 3****result of GSEA (p.adjust < 0.05)**

| <b>ID</b>                                  | <b>Set size</b> | <b>Enrichment score</b> | <b>NES</b> | <b>p value</b> | <b>p.adjust</b> | <b>q values</b> |
|--------------------------------------------|-----------------|-------------------------|------------|----------------|-----------------|-----------------|
| HALLMARK_COAGULATION                       | 137             | 0.590111815             | 1.525603   | 0.001015       | 0.033738        | 0.028411        |
| HALLMARK_EPITHELIAL_MESENCHYMAL_TRANSITION | 200             | 0.534257692             | 1.398473   | 0.002006       | 0.033738        | 0.028411        |
| HALLMARK_UV_RESPONSE_DN                    | 144             | 0.554095302             | 1.438537   | 0.002024       | 0.033738        | 0.028411        |
| HALLMARK_HYPOXIA                           | 200             | 0.519666952             | 1.36028    | 0.003009       | 0.037613        | 0.031674        |
| HALLMARK_HEME_METABOLISM                   | 199             | 0.508982159             | 1.332112   | 0.004012       | 0.04012         | 0.033786        |
| HALLMARK_IL2_STAT5_SIGNALING               | 198             | 0.502152014             | 1.314011   | 0.005015       | 0.041792        | 0.035193        |

1 **Supplemental Figure Legends**

2 **Supplemental Figure 1. Changes of hematological and iron parameters in SA1**  
3 **during pyridoxal phosphate hydrate administration.**

4

5 **Supplemental Figure 2. Changes of hematological and iron parameters in SA1 and**  
6 **SA2 during ALA administration.**

7 Arrows indicate RBC transfusion days.

8

9 **Supplemental Figure 3. Characteristics of XLSA patients and patient-derived iPSCs.**

10 **(A)** Representative immunofluorescence staining of SSEA-4 expression (top left) and  
11 TRA1-60 expression (top right) in MT1-iPSC3. The nuclei of all cells were stained with  
12 DAPI (bottom). Magnification of the objective lens:  $\times 10$ . Scale bars, 200  $\mu\text{m}$ . **(B)**  
13 Histological analysis of teratomas derived from MT1-iPSC1. Teratomas had tissues of all  
14 three germ layers, including pigment epithelium (ectoderm, top), cartilage (mesoderm,  
15 middle), and gut-like epithelium (endoderm, bottom). Magnification of the objective lens:  
16  $\times 20$ . Scale bars, 100  $\mu\text{m}$ . **(C)** Karyotype analysis of all XLSA patient-derived iPSC lines  
17 showed no abnormalities (46, XX). Representative data for MT1-iPSC1 are shown.

18

19 **Supplemental Figure 4. Hematopoietic and erythroid differentiation capacity of WT**  
20 **and MT iPSC lines.**

21 **(A)** Colony formation assay on day 14 of WT1-iPSC1, MT1-iPSC2, and MT1-iPSC2  
22 transduced with EGFP or wild-type *ALAS2*. Each line was tested in three independent  
23 experiments. **(B)** Percentages of CD235a<sup>+</sup> erythroblasts derived from the SA3 iPSC lines.  
24 The data represent three independent experiments from two WT iPSC lines (WT3-iPSC1

1 and WT3-iPSC2) or two MT iPSC lines (MT3-iPSC1 and MT3-iPSC2). (C)  
2 Representative flow cytometry data showing the co-expression of CD235a and CD71 in  
3 erythroblasts differentiated using the feeder-free method. (D) Cell viability was assessed  
4 using the trypan blue exclusion test. Time course of erythroid differentiation of iPSC-  
5 derived HPCs using the feeder-free method. Each line was tested in three independent  
6 experiments. (E) Percentages of CD235a+ cells. Erythroblasts were differentiated from  
7 iPSC-derived HPCs using the OP9 co-culture method. Each line was tested in three  
8 independent experiments. (F) Cell viability was assessed using the trypan blue exclusion  
9 test. Time course of erythroid differentiation of iPSC-derived HPCs using the OP9 co-  
10 culture method is shown. Each line was tested in three independent experiments. (G) The  
11 expression level of *ALAS2* in iPSC-derived erythroblasts derived from one control iPSC  
12 line, three WT iPSC lines, and four MT iPSC lines is shown. Each line was tested in three  
13 independent experiments. The expression levels were normalized to that of *GAPDH*. All  
14 data are presented as the mean  $\pm$  SEM. *P*-values were calculated using the unpaired, two-  
15 tailed Student's *t*-test. \*\*\*\**P* < 0.0001; N.S., not significant.

16

17 **Supplemental Figure 5. Improvement of erythroid differentiation capacity with ALA**  
18 **and AZA treatment.**

19 (A) Schema of the protocol for erythroid differentiation with ALA administration. (B)  
20 Percentages of CD235a+ cells treated with DMSO or ALA. Each line was tested in three  
21 independent experiments. (C) Representative flow cytometry data of erythroblasts  
22 differentiated from MT1-iPSC2 using the feeder-free erythroid differentiation method  
23 with DMSO or ALA. (D) Pellets of erythroblasts derived from MT1-iPSC2. CD235a+  
24 cells were sorted using FACS on day 34. (E) Representative flow cytometry data of

1 erythroblasts differentiated from MT1-iPSC2 using the feeder-free erythroid  
2 differentiation method with DMSO or AZA. **(F)** Representative Sanger sequencing data  
3 of *ALAS2* cDNA from erythroblasts derived from MT1-iPSC1 treated with DMSO or  
4 AZA using the OP9 co-culture method. All data are presented as the mean  $\pm$  SEM. *P*-  
5 values were calculated using the unpaired, two-tailed Student's *t*-test. \**P* < 0.05; \*\*\*\**P*  
6 < 0.0001.

Supplemental Figure 1

SA1

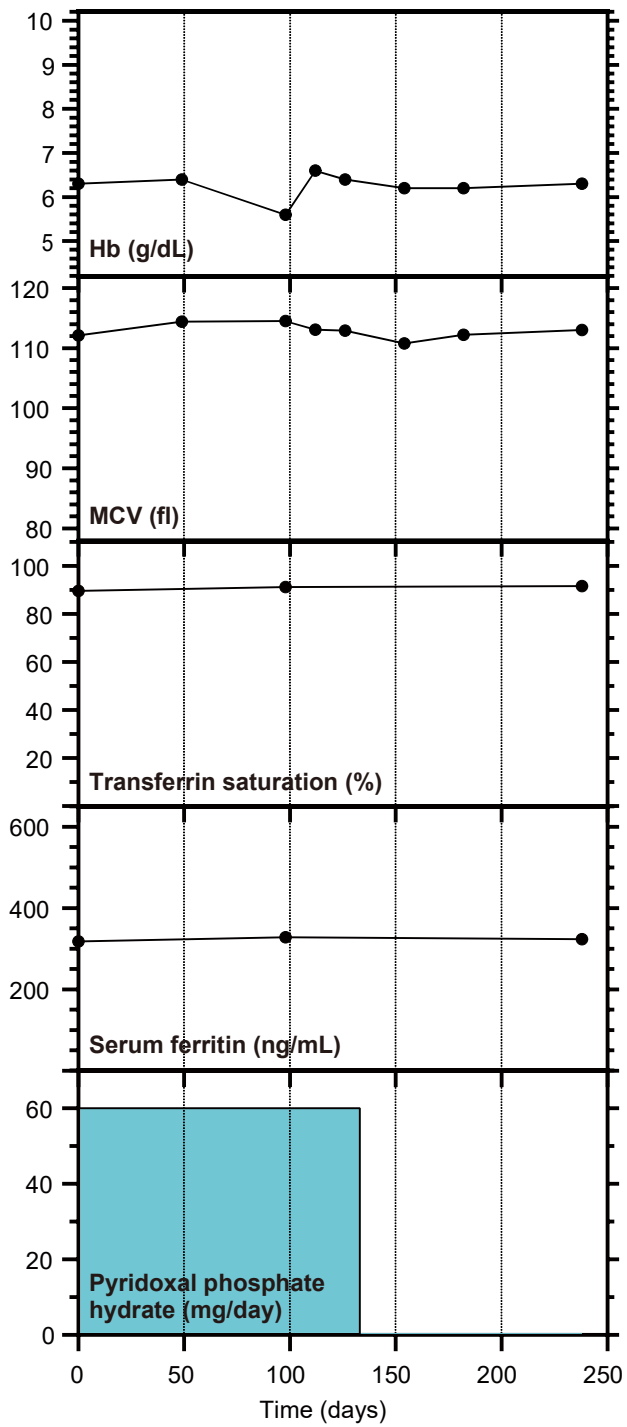

Supplemental Figure 2

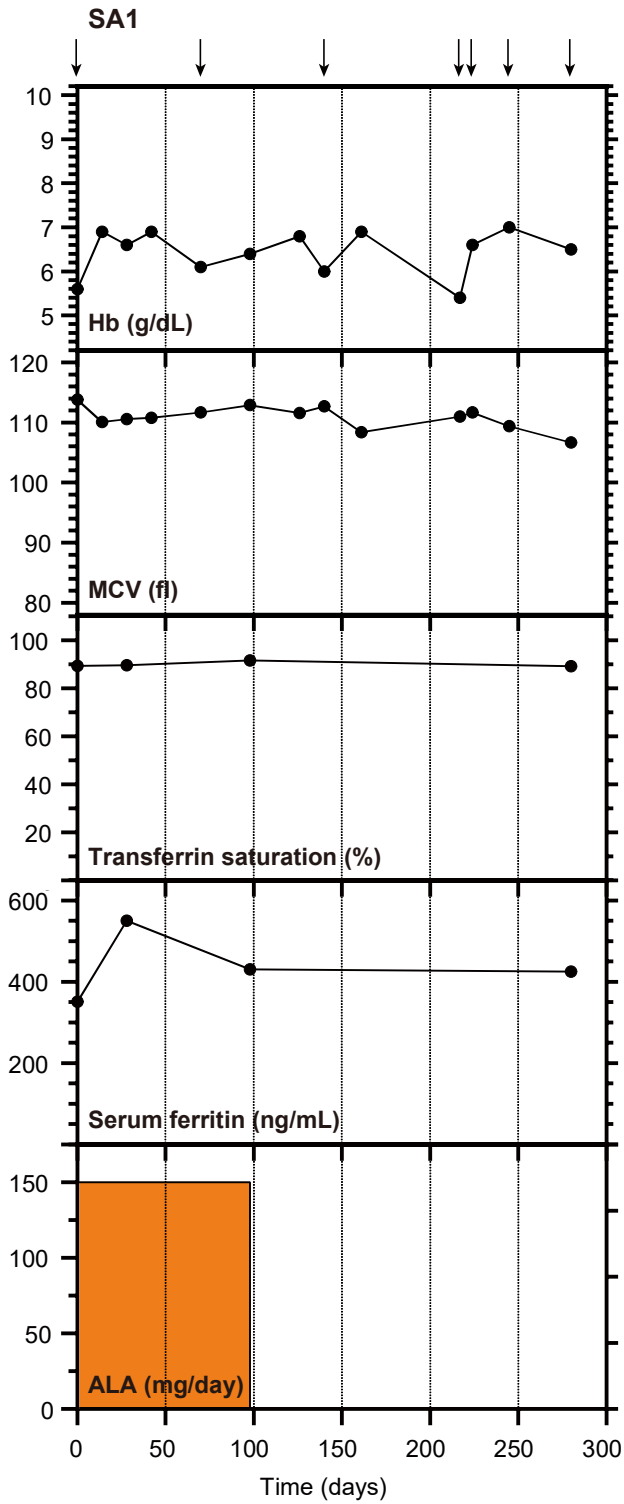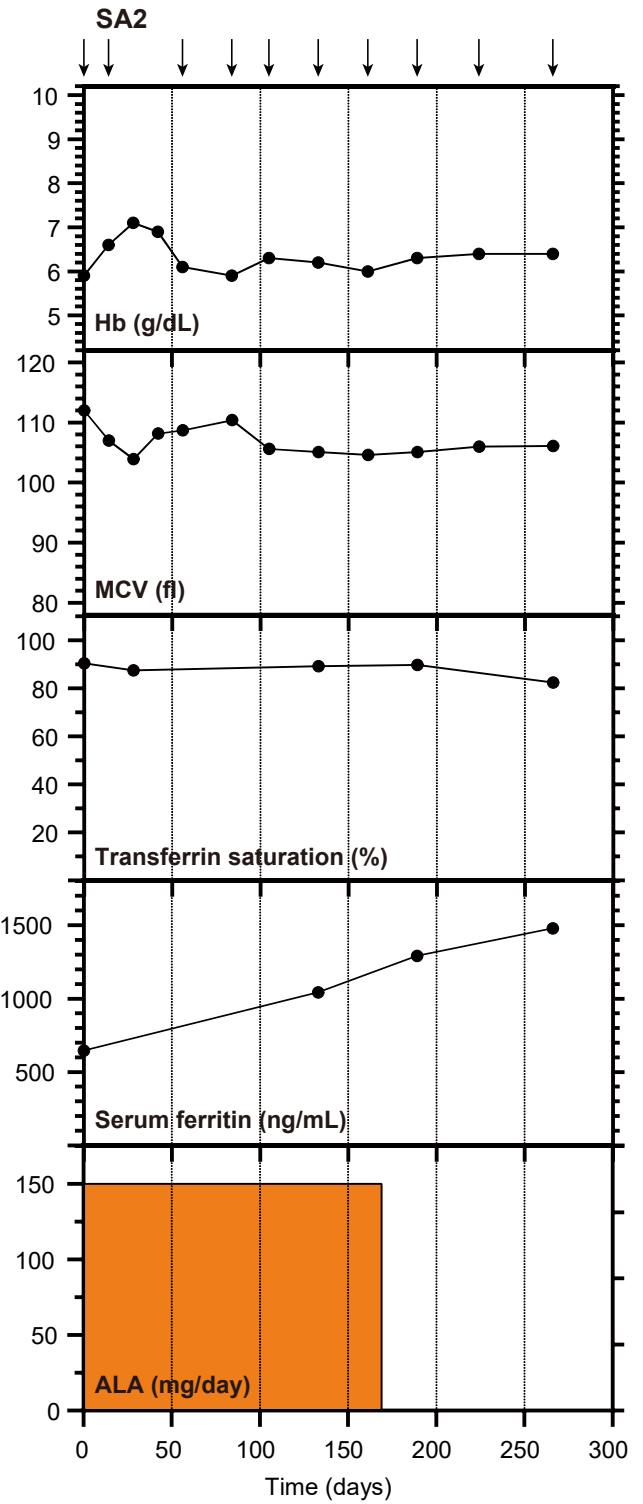

# Supplemental Figure 3

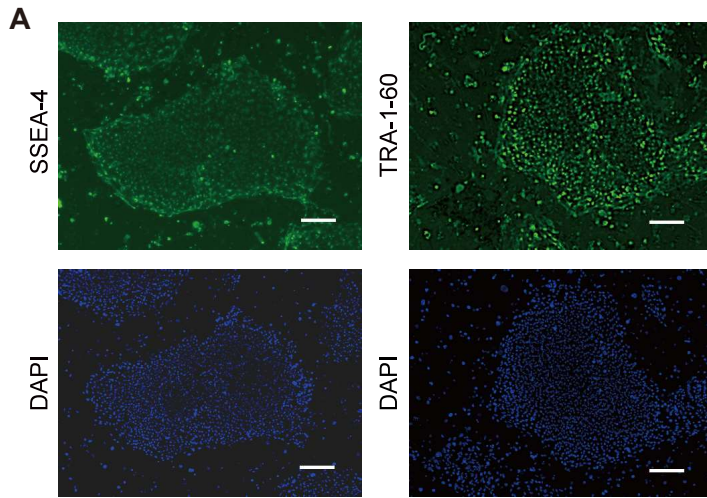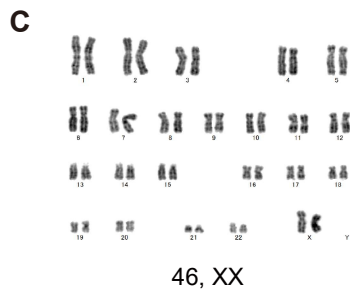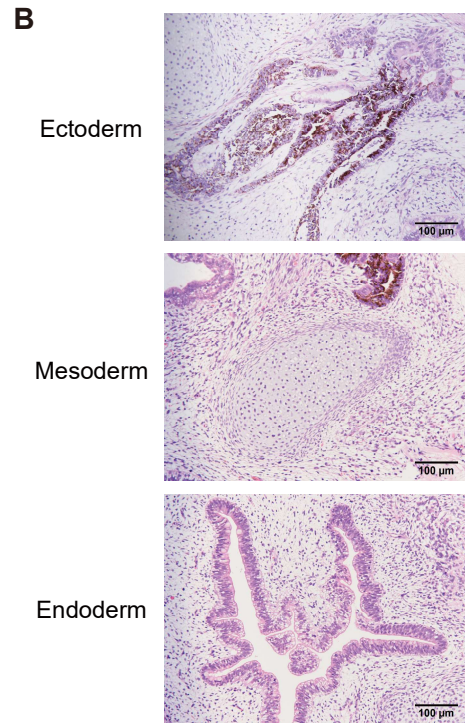



# Supplemental Figure 4

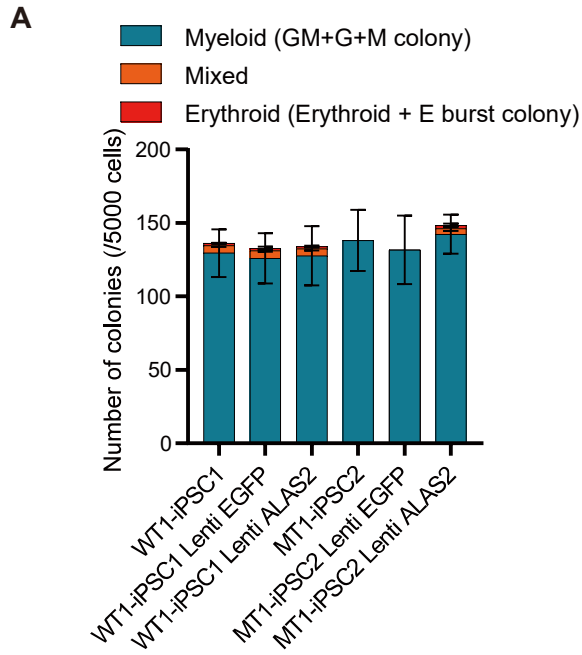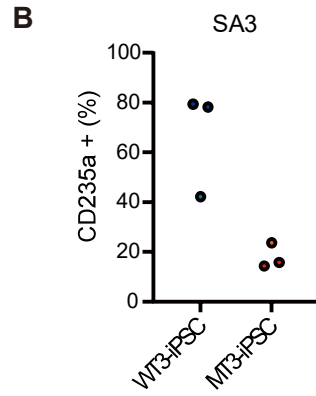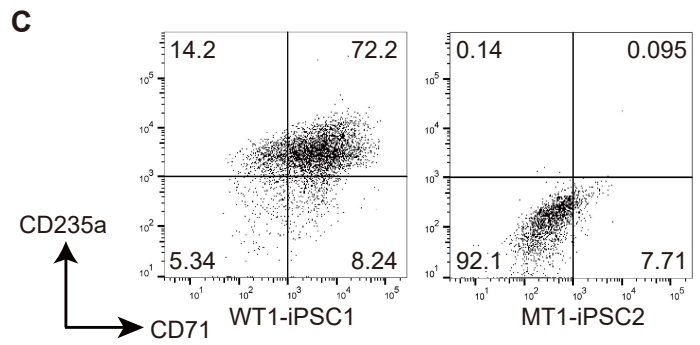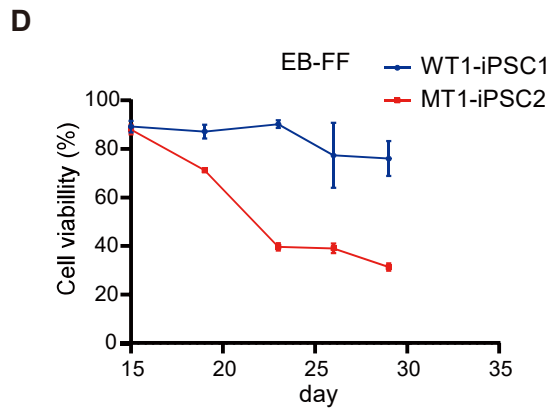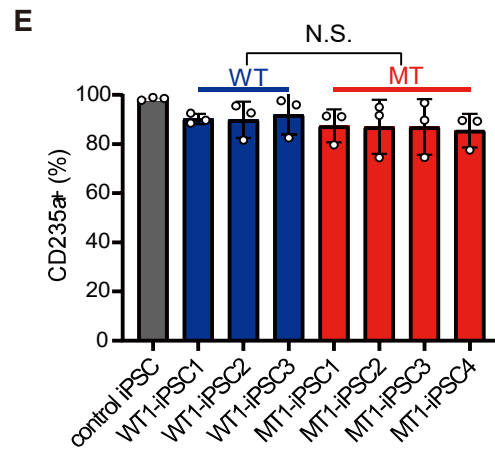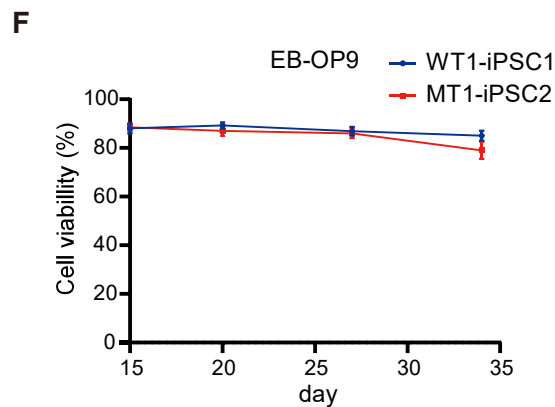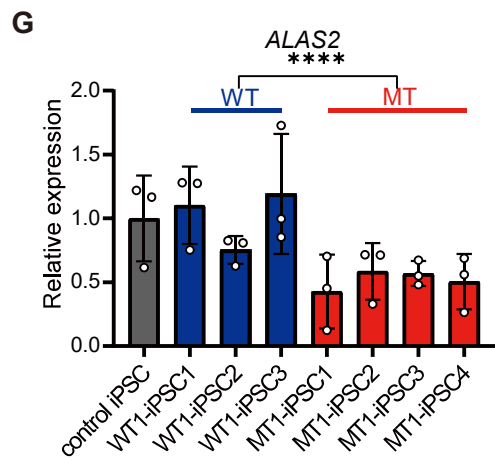

# Supplemental Figure 5

**A**

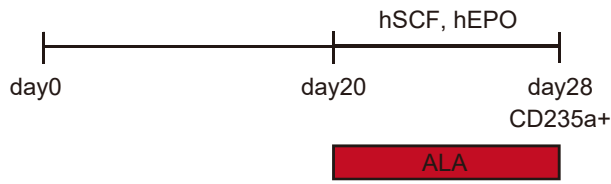

**B**

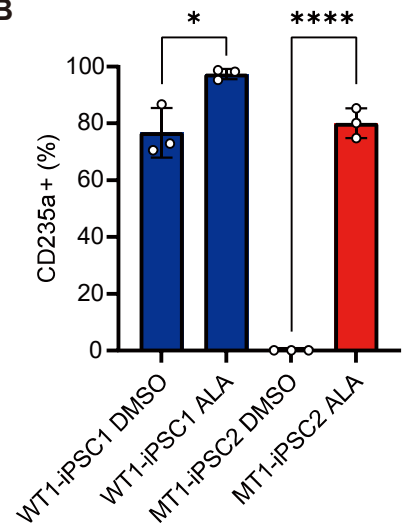

**C**

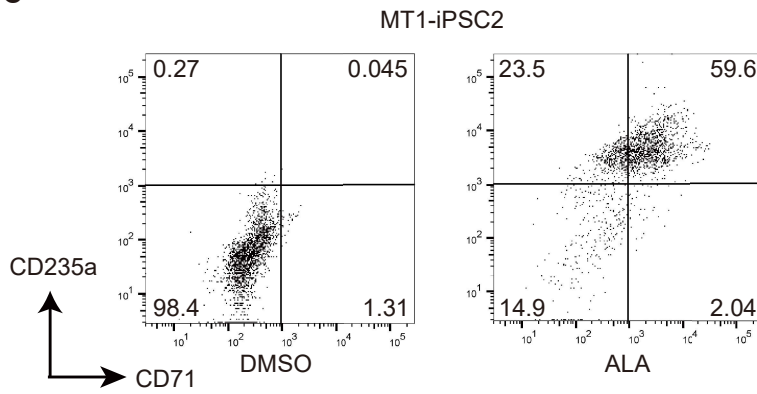

**D**

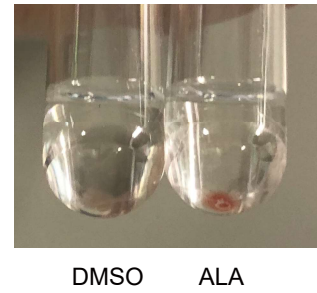

**E**

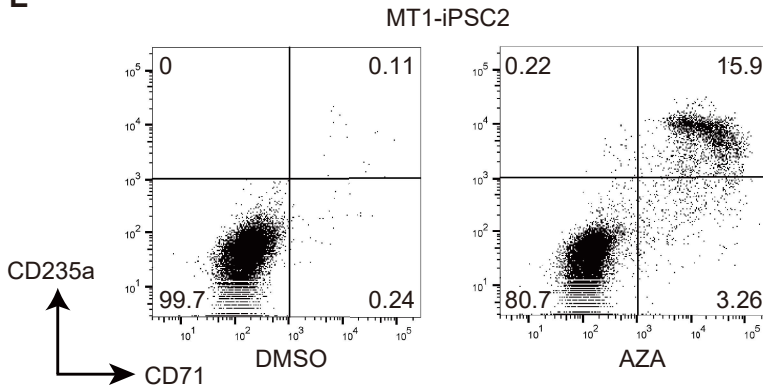

**F**

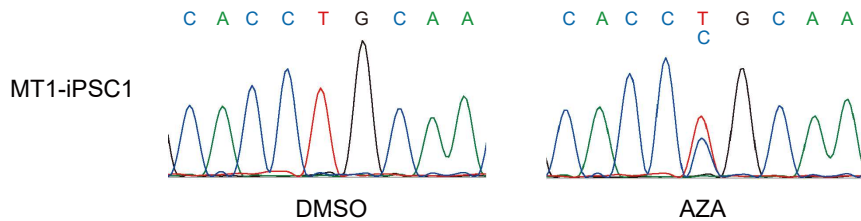

Supplement: advancesADV2021005664-suppl1.pdf [file advancesADV2021005664-suppl1.pdf]
